# Supplementary material
Source: publisher figshare collection journal article supplement (https://frontiersin.figshare.com/ndownloader/files/26060675)
Supplement: Supplementary file 1 [file 26060675]

Archive with 7 entries (7 files):
- Caption for the supplementary figures.docx
- Figure1_SuppMat.jpeg
- Figure2A_SuppMat.jpg
- Figure2B_SuppMat.jpg
- Figure3_SuppMat.jpeg
- Figure4SuppMat.jpeg
- Figure5_SuppMat.jpeg
