# Supplementary material
Source: publisher figshare collection journal article supplement (https://frontiersin.figshare.com/ndownloader/files/26060675)
Supplement: Supplementary file 1 [file 26060675 › Caption for the supplementary figures.docx]

**Supplementary figures**

**Figure 1.** Shipboard atmospheric CO2 concentrations measured during this study. A. The mole fractions in ppm measured in the infrared analyzer. B. The fCO2 values calculated from the mole fractions following the methods of Pierrot et al., (2009) with Lencina-Avila et al., (2016)

**Figure 2A.** The linear correlation for the diurnal (day and night) underway fluorescence derived chl-a calibrated with chl-a extract measurements from discrete samples (N=109).

**Figure 2B.**  Linear correlation for the combined diurnal underway fluorescence derived chl-a calibrated with chl-a extract measurements from discrete samples (N=109).

**Figure 3.** Sea-air fCO2 disequilibrium (∆fCO2) in the study region from sea‐surface fCO2 measurements of 2009 to 2018 from SOCAT v-2020 database (blue), with the ∆fCO2 calculated from this study (orange) during the same period (March and April). Atmospheric fCO2 was determined using the monthly averaged values obtained from the South Pole meteorological station (<https://www.esrl.noaa.gov/gmd/dv/site/?stacode=none>). Positive values indicate CO2 release into the atmosphere, negative values indicate CO2 uptake.

**Figure 4.** Mean values of available sea surface fCO2 in the SOCAT v-2020 from 1999-2018 for A. March and B. April. The black transect in A and B is the study transect and the inset map the fCO2ssw along the transect. C. The anomaly is the difference between fCO2ssw in this study after griding the values to 1o latitude and 1o longitude, and the mean values of fCO2ssw in the SOCAT v-2020 where there are available observations. Positive values indicate that the fCO2ssw for this study is higher than the mean value from the SOCAT v-2020 and vice versa for the negative values.

**Figure 5.** Sea surface fCO2 observations for this study (blue colour) with fCO2 observations in SOCAT v-2020 (black colour) for the same month and year (March 2019) as this study, showing similar distributions for both observations.
