# Supplementary material
Source: publisher figshare collection journal article supplement (https://frontiersin.figshare.com/ndownloader/files/26060675)

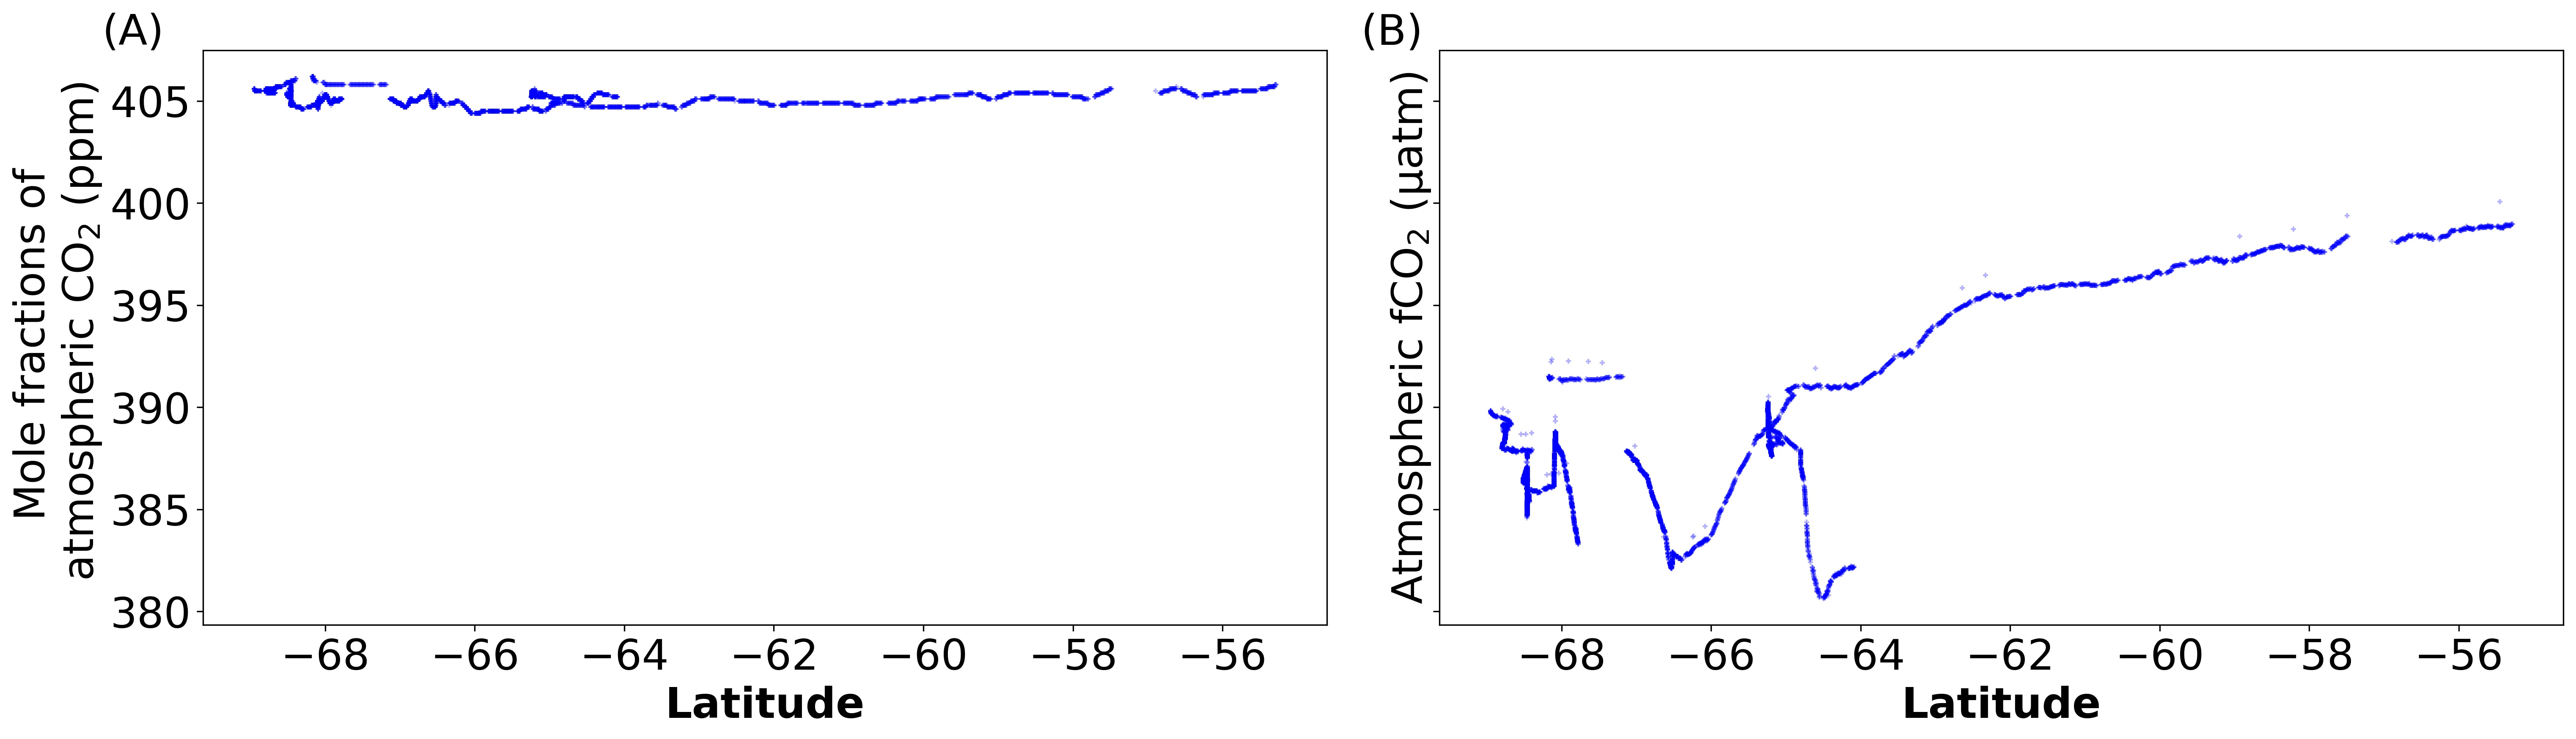

Supplement: Supplementary file 1 [file 26060675 › Figure1_SuppMat.jpeg]

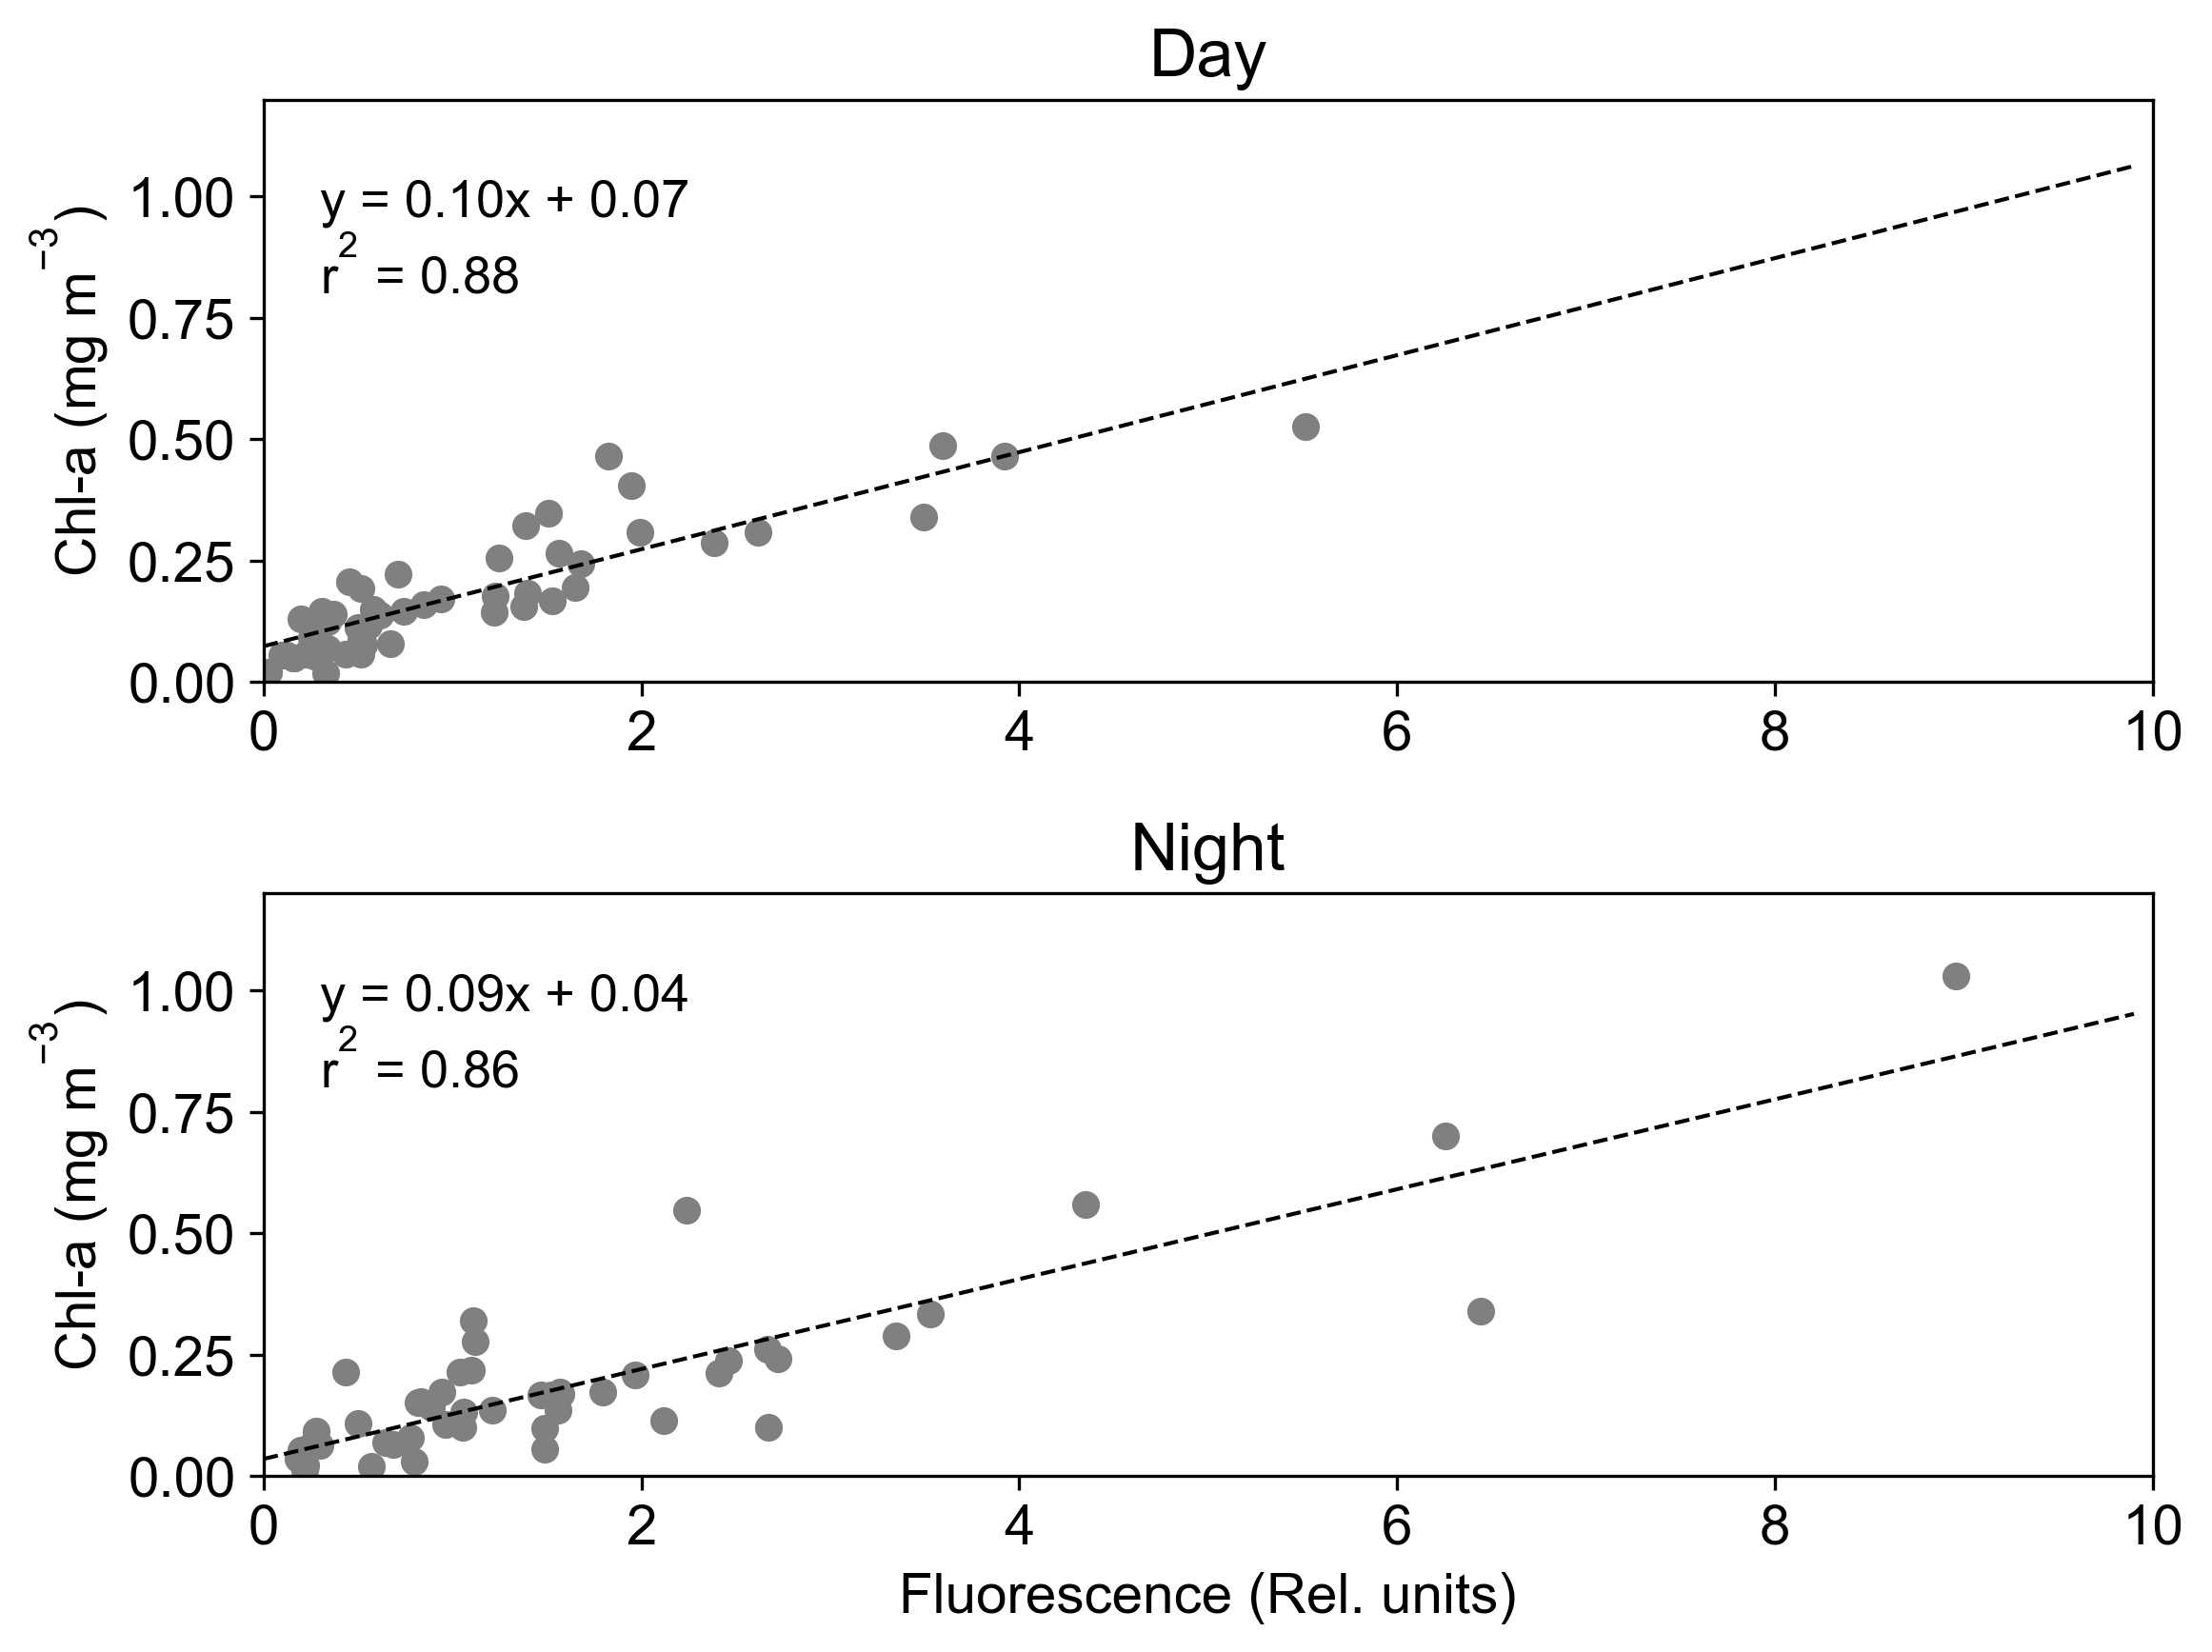

Supplement: Supplementary file 1 [file 26060675 › Figure2A_SuppMat.jpg]

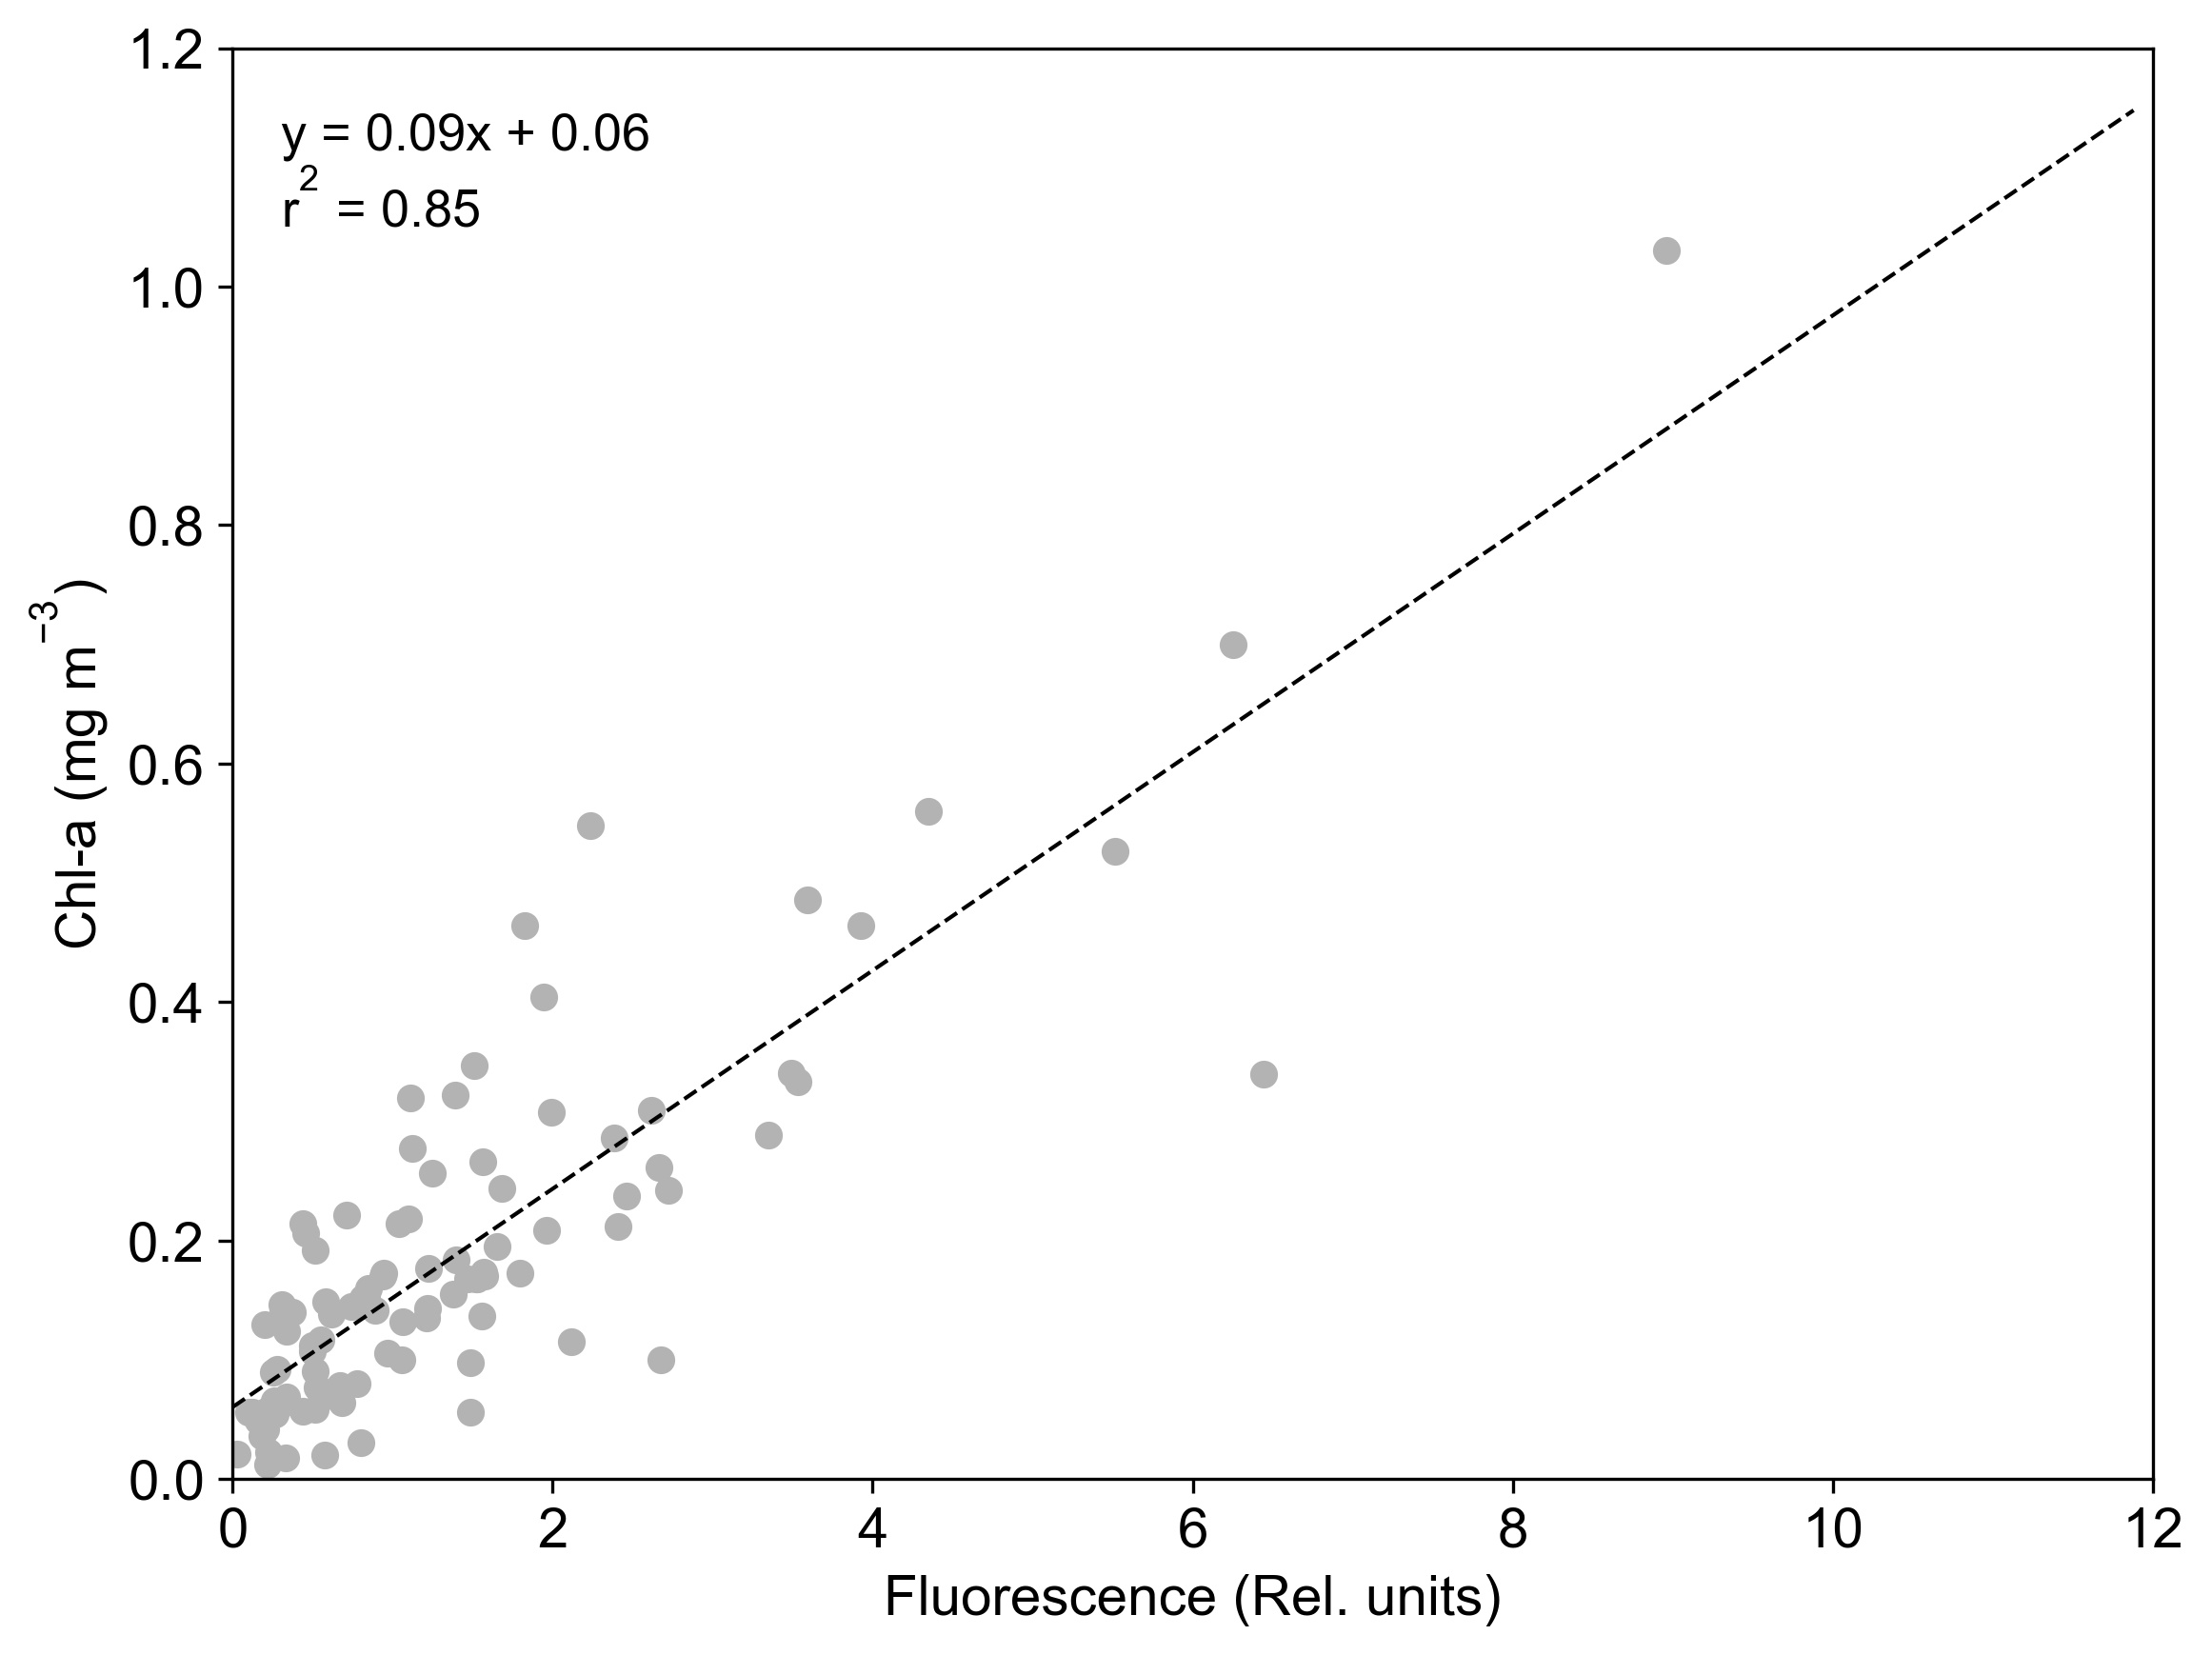

Supplement: Supplementary file 1 [file 26060675 › Figure2B_SuppMat.jpg]

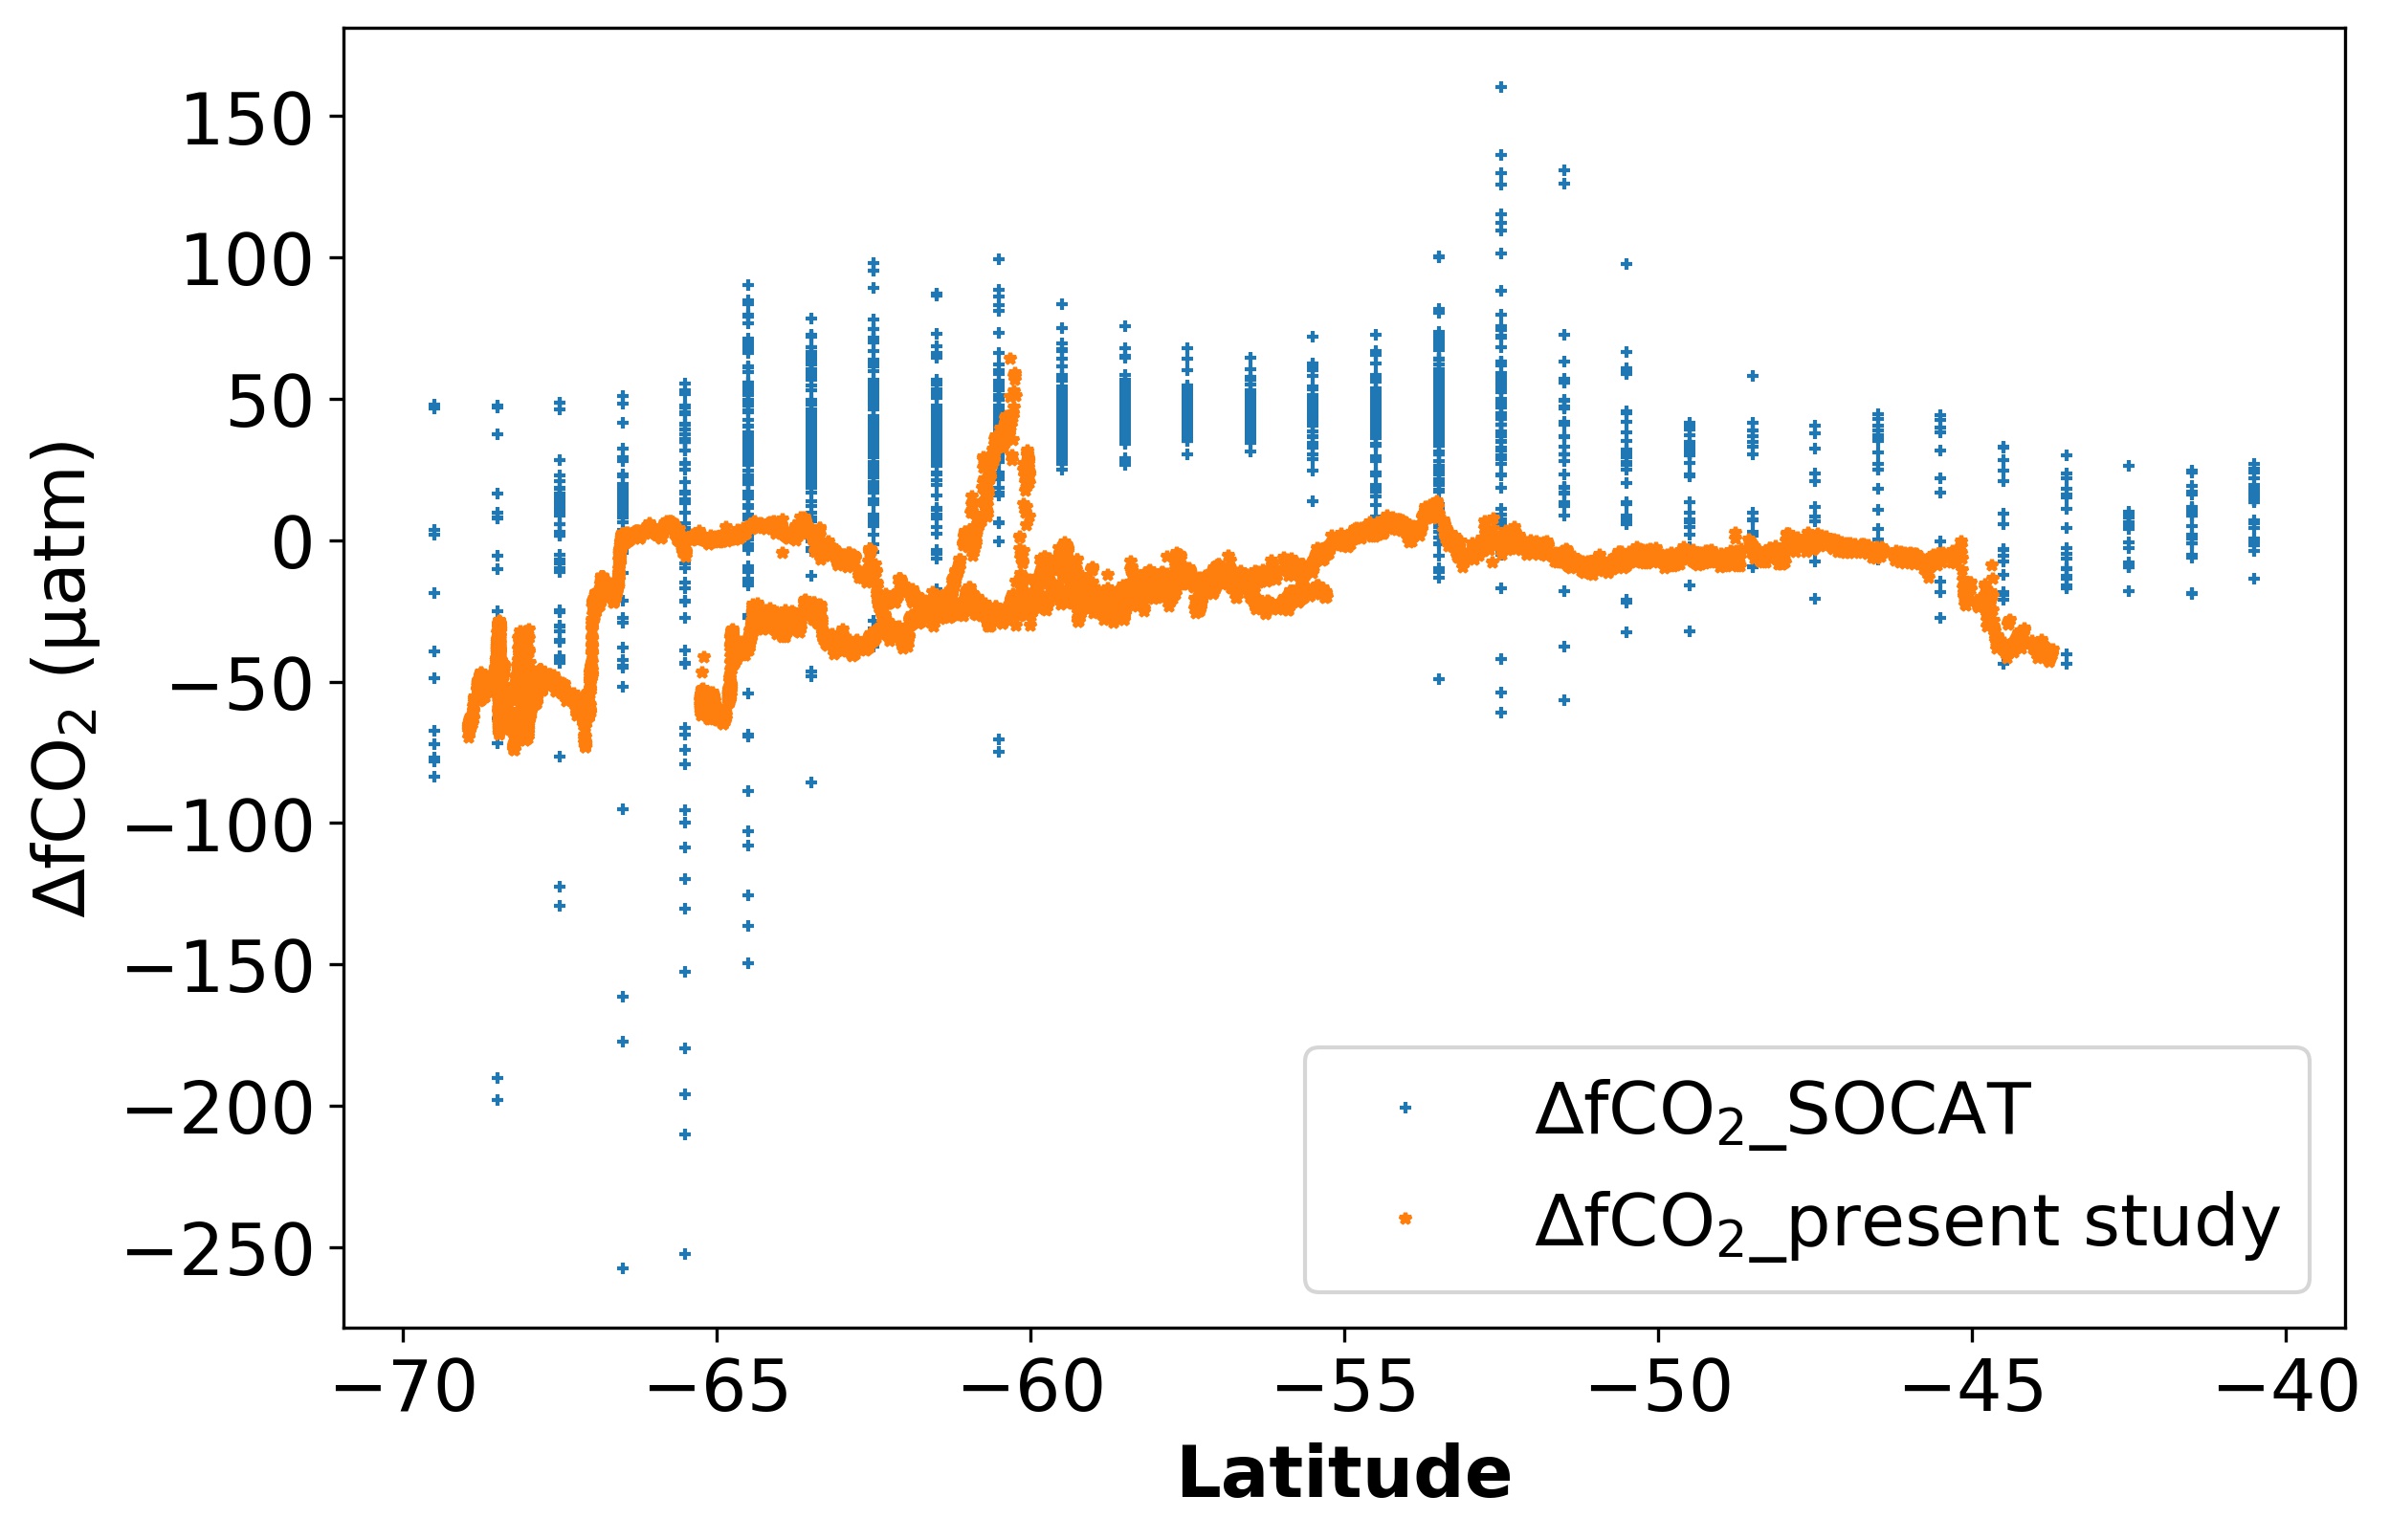

Supplement: Supplementary file 1 [file 26060675 › Figure3_SuppMat.jpeg]

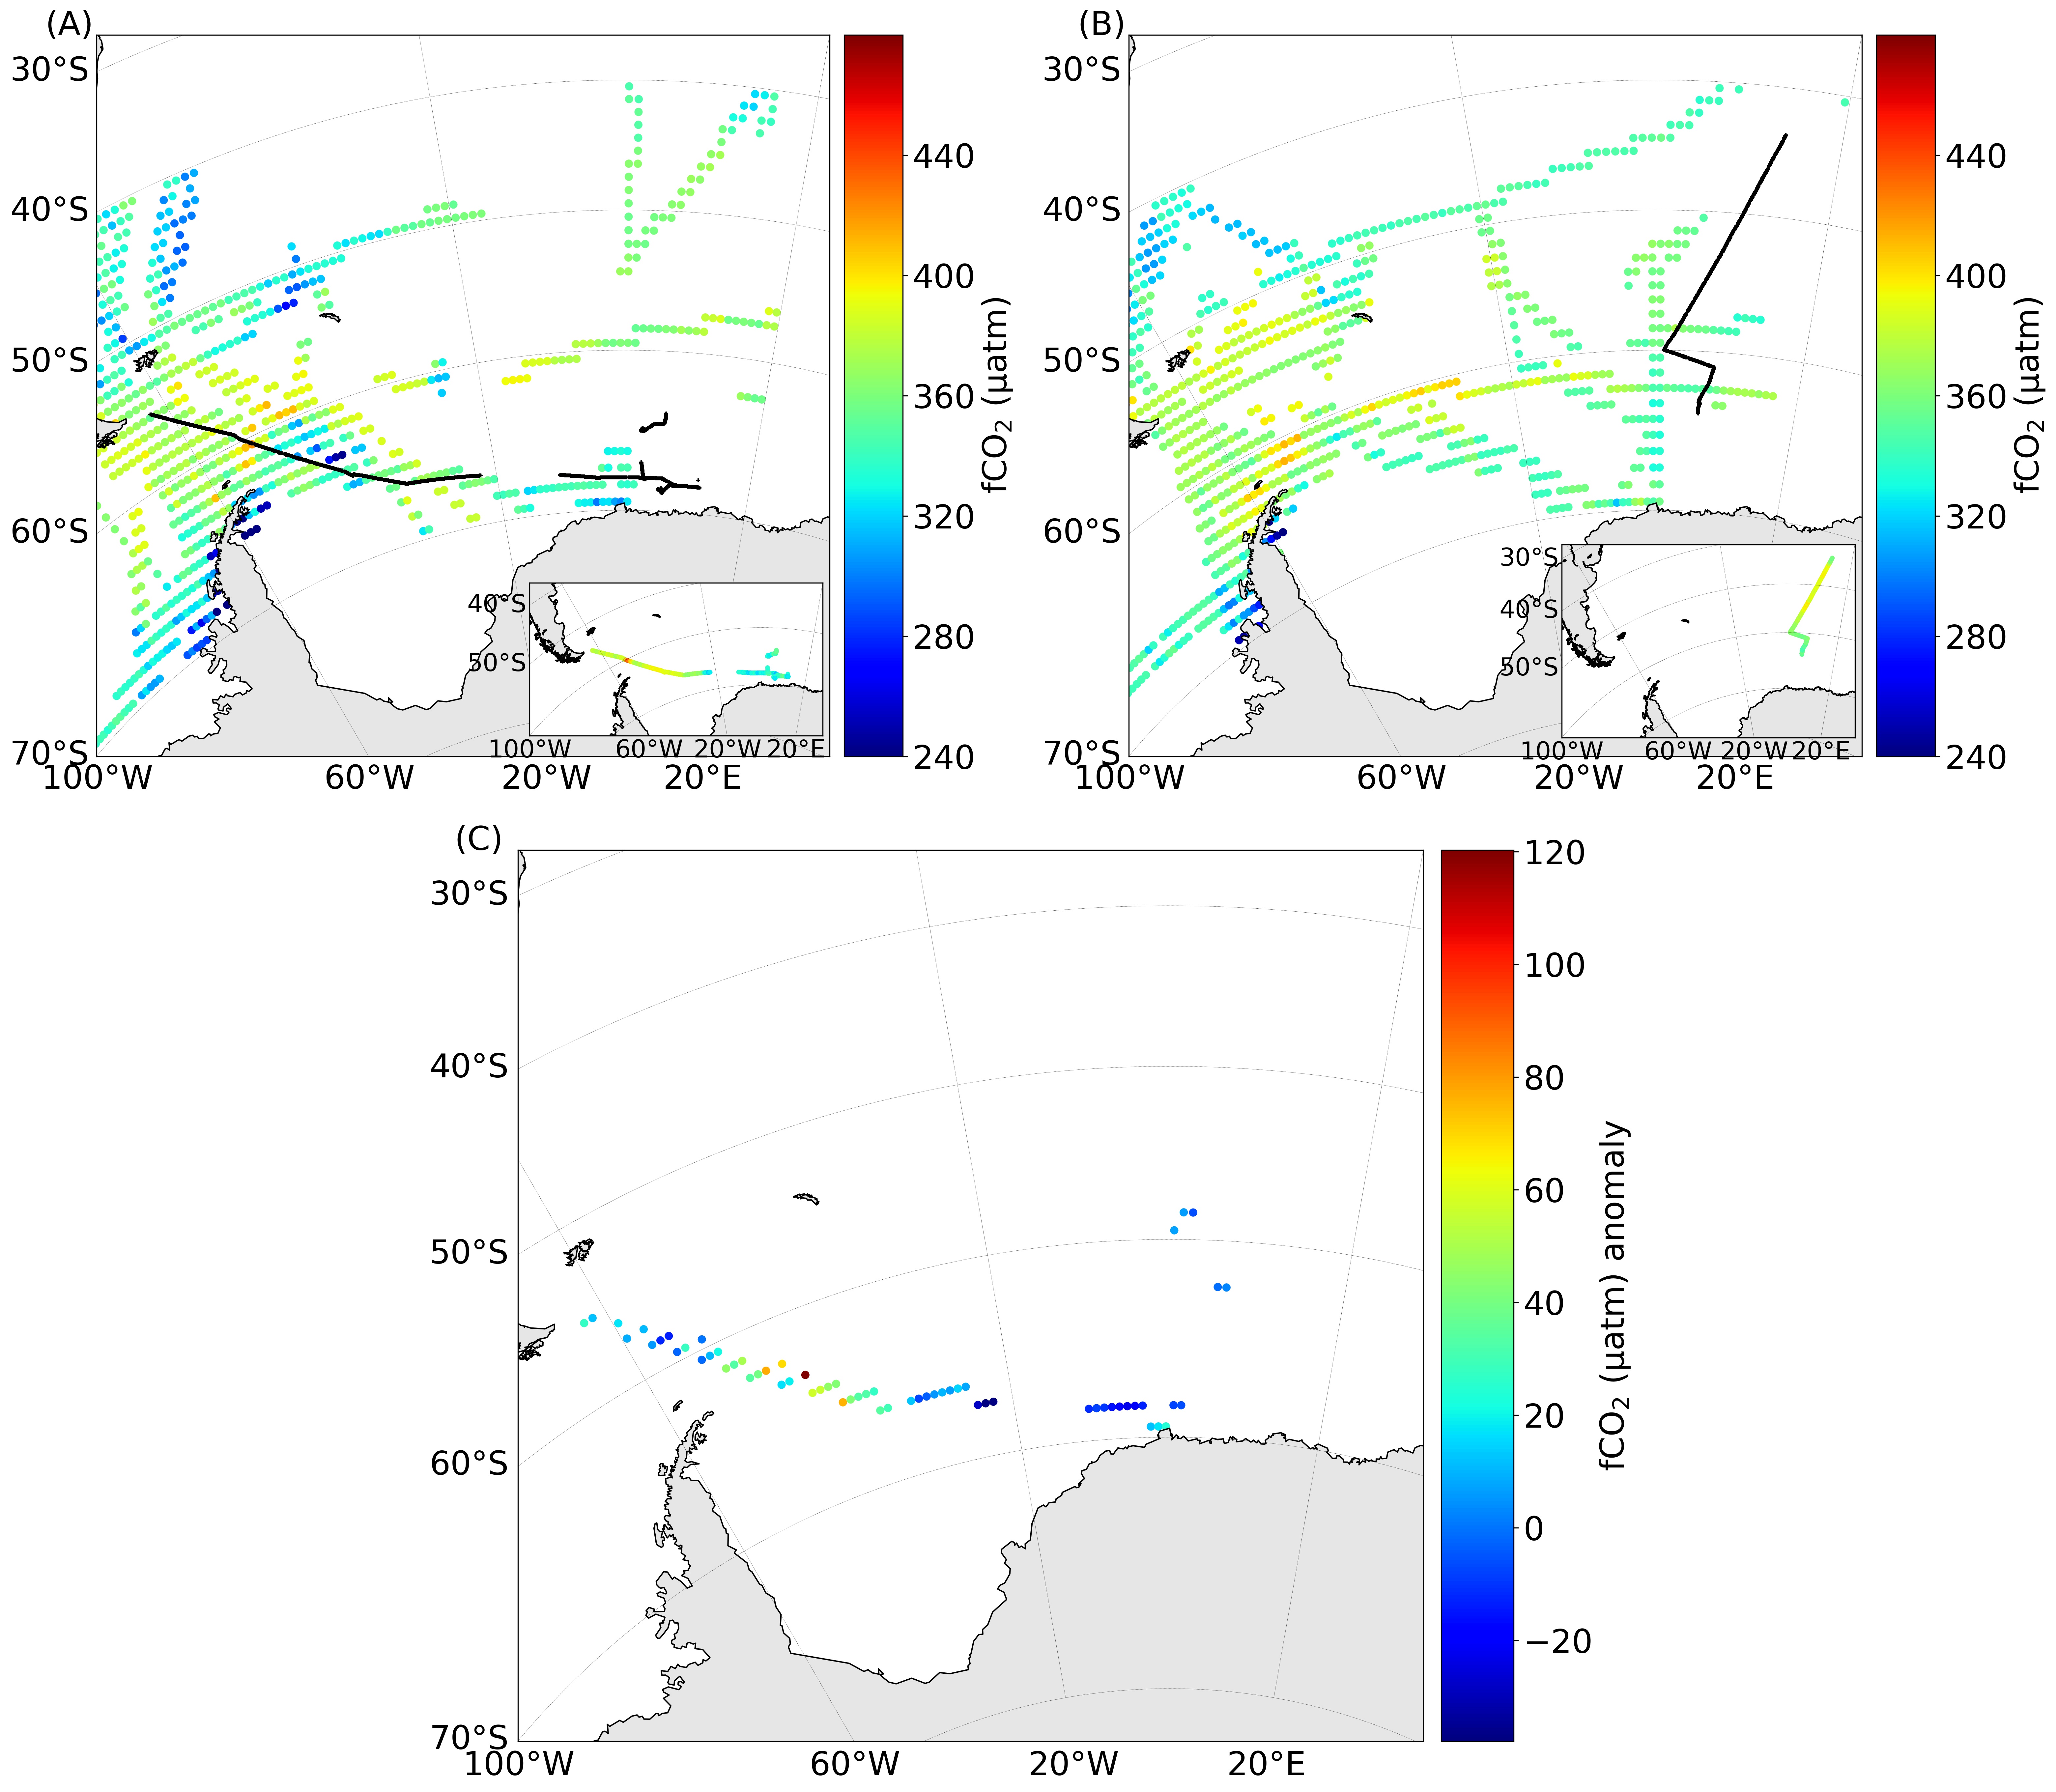

Supplement: Supplementary file 1 [file 26060675 › Figure4SuppMat.jpeg]

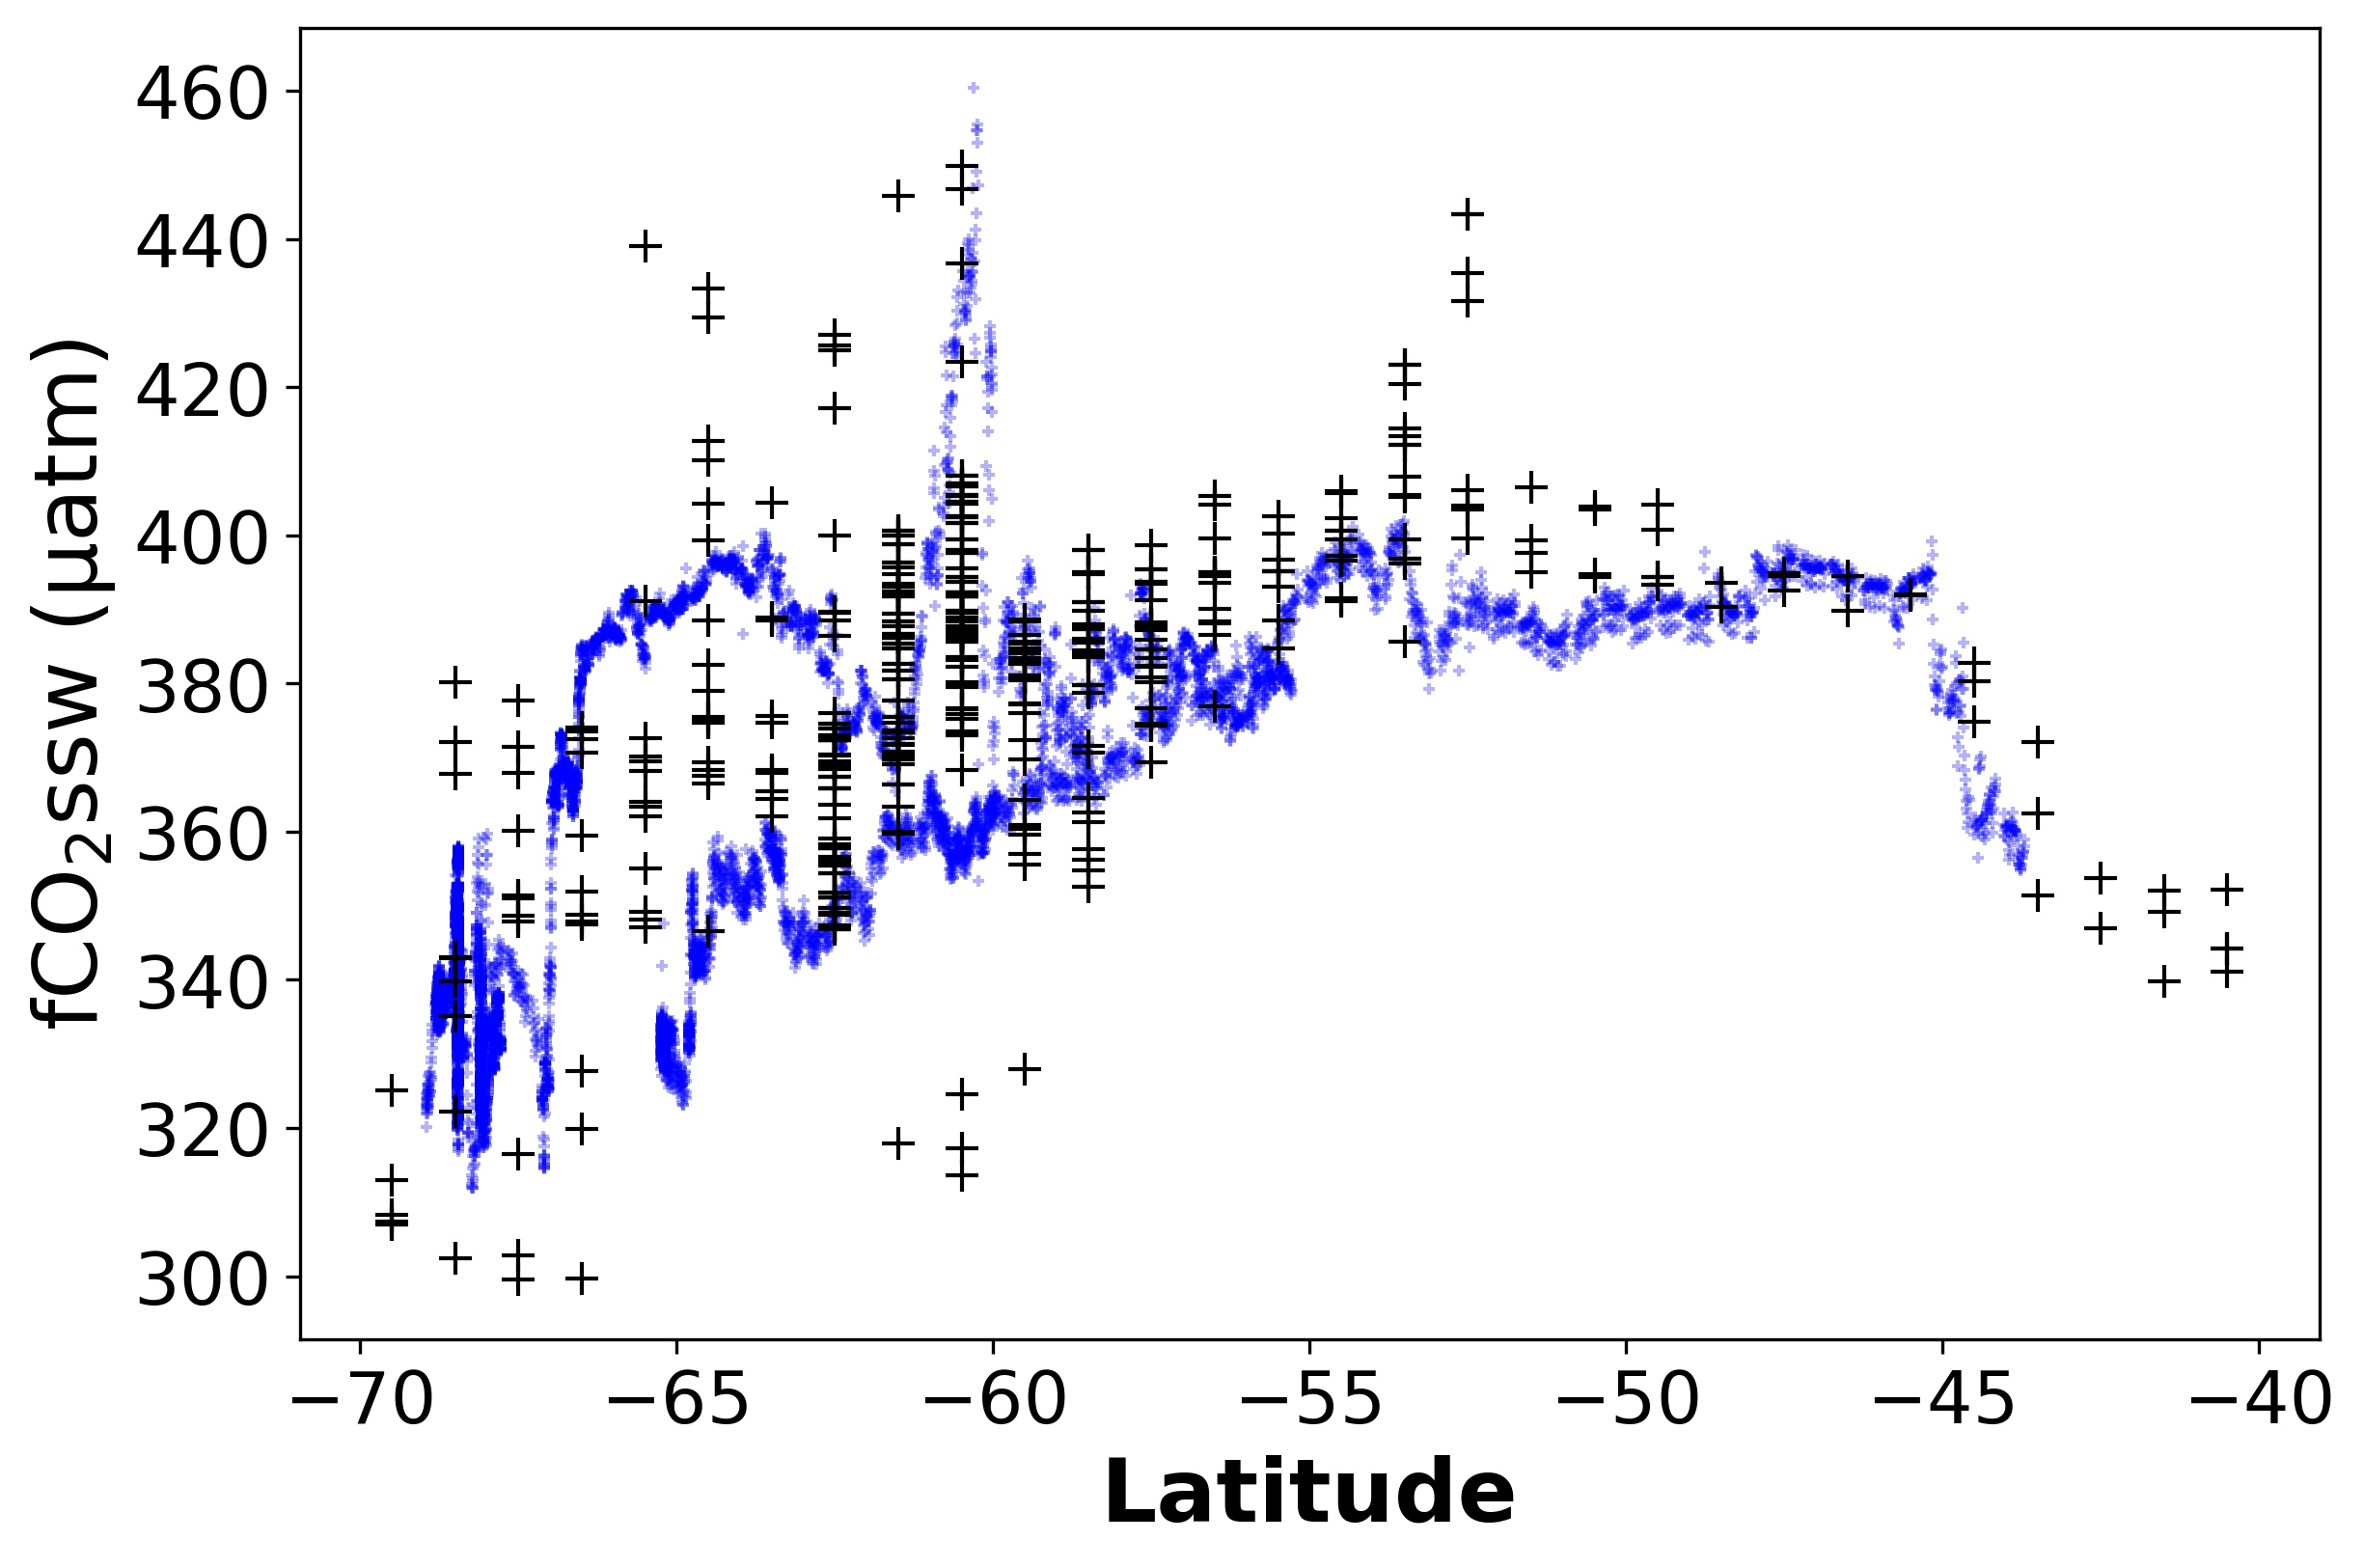

Supplement: Supplementary file 1 [file 26060675 › Figure5_SuppMat.jpeg]
